# Supplementary material
Source: PubMed Central journal article supplement (PMC7820722)
Supplement: mmc2.pdf [file mmc2.pdf]

## De novo variants in *POLR3B* cause ataxia, spasticity, and demyelinating neuropathy

Djordja Djordjevic,<sup>1</sup> Maxime Pinard,<sup>2</sup> Marie-Soleil Gauthier,<sup>2</sup> Constance Smith-Hicks,<sup>3</sup> Trevor L. Hoffman,<sup>4</sup> Nicole I. Wolf,<sup>5</sup> Renske Oegema,<sup>6</sup> Ellen van Binsbergen,<sup>6</sup> Berivan Baskin,<sup>7</sup> Geneviève Bernard,<sup>8</sup> Sébastien Fribourg,<sup>9</sup> Benoit Coulombe,<sup>2,10</sup> and Grace Yoon<sup>1,11,\*</sup>

### Summary

*POLR3B* encodes the second-largest catalytic subunit of RNA polymerase III, an enzyme involved in transcription. Bi-allelic pathogenic variants in *POLR3B* are a well-established cause of hypomyelinating leukodystrophy. We describe six unrelated individuals with *de novo* missense variants in *POLR3B* and a clinical presentation substantially different from POLR3-related leukodystrophy. These individuals had afferent ataxia, spasticity, variable intellectual disability and epilepsy, and predominantly demyelinating sensory motor peripheral neuropathy. Protein modeling and proteomic analysis revealed a distinct mechanism of pathogenicity; the *de novo* POLR3B variants caused aberrant association of individual enzyme subunits rather than affecting overall enzyme assembly or stability. We expand the spectrum of disorders associated with pathogenic variants in *POLR3B* to include a *de novo* heterozygous POLR3B-related disorder.

RNA polymerase III (pol III) is a 17-subunit enzyme involved in the transcription of small non-coding RNAs, which regulate transcription in eukaryotes.<sup>1</sup> *POLR3B* (MIM: 614366) encodes the second-largest catalytic subunit of pol III, POLR3B. Bi-allelic mutations in *POLR3B* and genes encoding other POLR3 subunits cause hypomyelinating leukodystrophy type 8 (MIM: 614381) with a wide clinical spectrum of associated symptoms. These include endocrine dysfunction (hypogonadism, reproductive failure, and delayed puberty), ocular abnormalities, and abnormal dentition (hypodontia and oligodontia).<sup>1,2</sup>

The original descriptions of POLR3-related leukodystrophy were of individuals with hypodontia, ataxia, and hypomyelination,<sup>3,4</sup> followed by individuals with additional endocrine abnormalities of hypogonadotropic hypogonadism.<sup>2</sup> The initial identification of the genetic basis of POLR3-related leukodystrophy enabled definitive association of this constellation of clinical features with recessive mutations in *POLR3A* (MIM: 614258), *POLR3B*, *POLR1C* (MIM: 610060), and *POLR3K* (MIM: 606007).<sup>1,5–9</sup> In total, five previously distinct clinical phenotypes were described prior to the identification of their shared molecular basis. These include hypomyelination, hypodontia, hypogonadotropic hypogonadism (4H syndrome); ataxia, delayed dentition, and hypomyelination (ADDH); tremor-ataxia

with central hypomyelination (TACH); leukodystrophy with oligodontia (LO); and hypomyelination with cerebellar atrophy and hypoplasia of the corpus callosum (HCAHC). These previously distinct clinical phenotypes were subsequently re-classified as 4H leukodystrophy after the discovery of the shared phenotypic spectrum and genetics<sup>10</sup> and are now collectively referred to as POLR3-related leukodystrophy.

The classic neurological features of individuals with POLR3B-related leukodystrophy consist primarily of central nervous system involvement, and abnormal electromyogram and nerve conduction studies (EMG/NCSs) have not been reported in these individuals.<sup>1,2</sup> To our knowledge, no prior publications have reported sensory or peripheral motor abnormalities of clinical significance in individuals with bi-allelic *POLR3B* mutations.

Six unrelated individuals were enrolled in the study, which was approved by the research ethics board of the Hospital for Sick Children (REB #100009004) and the McGill University Health Center (11-105-PED and 2019-4972). Five individuals (subjects 1–4 and 6) were found to have pathogenic variants in *POLR3B* from exome sequencing completed at GeneDx (Gaithersburg, MD). One additional individual (subject 5) was diagnosed at the University Medical Center Utrecht. All parents/legal guardians provided written informed consent for their

<sup>1</sup>Division of Neurology, Department of Paediatrics, The Hospital for Sick Children, University of Toronto, Toronto, ON M5G 1X8, Canada; <sup>2</sup>Translational Proteomics Research Unit, Institut de Recherches Cliniques de Montréal, Montréal, QC H2W 1R7, Canada; <sup>3</sup>Division of Neurogenetics, Department of Neurology, Kennedy Krieger Institute and Johns Hopkins University School of Medicine, Baltimore, MD, 21205, USA; <sup>4</sup>Southern California Kaiser Permanente Medical Group, Anaheim, CA, 92801, USA; <sup>5</sup>Department of Child Neurology, Amsterdam Leukodystrophy Center, Emma Children's Hospital, Amsterdam University Medical Centers, Vrije Universiteit Amsterdam, and Amsterdam Neuroscience, 1081 HV Amsterdam, the Netherlands; <sup>6</sup>Department of Genetics, University Medical Center Utrecht, 3584 EA Utrecht, the Netherlands; <sup>7</sup>GeneDx, Gaithersburg, MD, 20877, USA; <sup>8</sup>Departments of Neurology and Neurosurgery, Pediatrics and Human Genetics, McGill University, Department of Specialized Medicine, Division of Medical Genetics, McGill University Health Center, and Child Health and Human Development Program, Research Institute of the McGill University Health Centre, Montréal, QC, H4A 3J1, Canada; <sup>9</sup>Université de Bordeaux, INSERM U1212, CNRS 5320, Bordeaux, 33076, France; <sup>10</sup>Department of Biochemistry and Molecular Medicine, Université de Montréal, Montréal, QC, H3C 3J7, Canada; <sup>11</sup>Division of Clinical and Metabolic Genetics, Department of Paediatrics, The Hospital for Sick Children, University of Toronto, Toronto, ON, M5G 1X8, Canada

\*Correspondence: [grace.yoon@utoronto.ca](mailto:grace.yoon@utoronto.ca)

<https://doi.org/10.1016/j.ajhg.2020.12.002>

© 2020 American Society of Human Genetics.

**Table 1. Clinical and genetic characteristics of individuals with *de novo* POLR3B variants**

| Subject                                                   | 1                                                                                                                | 2                                                    | 3                                                                 | 4                                                                                                         | 5                                                                           | 6                                                                                                       |
|-----------------------------------------------------------|------------------------------------------------------------------------------------------------------------------|------------------------------------------------------|-------------------------------------------------------------------|-----------------------------------------------------------------------------------------------------------|-----------------------------------------------------------------------------|---------------------------------------------------------------------------------------------------------|
| <b>POLR3B variant (NM_018082.5)</b>                       | c.1124A>T ( <i>de novo</i> )                                                                                     | c.1277T>C ( <i>de novo</i> )                         | c.3137G>A ( <i>de novo</i> )                                      | c.1094C>T ( <i>de novo</i> )                                                                              | c.1087G>A ( <i>de novo</i> )                                                | c.1385C>G ( <i>de novo</i> )                                                                            |
| <b>Predicted effect on protein</b>                        | p.Asp375Val                                                                                                      | p. Leu426Ser                                         | p. Arg1046His                                                     | p.Ala365Val                                                                                               | p.Glu363Lys                                                                 | p.Thr462Arg                                                                                             |
| <b>Age at last review</b>                                 | 16 years                                                                                                         | 4 years                                              | 11 years                                                          | 22 years                                                                                                  | 8 years                                                                     | 14 years                                                                                                |
| <b>Gender</b>                                             | female                                                                                                           | male                                                 | male                                                              | male                                                                                                      | female                                                                      | female                                                                                                  |
| <b>Current height (centile)</b>                           | 166 cm (50%)                                                                                                     | 96 cm (1%)                                           | 152 cm (95%)                                                      | 165 cm (5%)                                                                                               | 116 cm (10%)                                                                | 157 cm (30%)                                                                                            |
| <b>Current weight (centile)</b>                           | 74.3 kg (85%)                                                                                                    | 13.5 kg (1%)                                         | 51.9 kg (95%)                                                     | 95.45 kg (95%)                                                                                            | 19.9 kg (20%)                                                               | 55.4 kg (63%)                                                                                           |
| <b>Current OFC (centile)</b>                              | 51 cm (<3%)                                                                                                      | 48 cm (5%)                                           | 55 cm (85%)                                                       | 58 cm (~98%)                                                                                              | 47 cm (~3%)                                                                 | 51 cm (<2%)                                                                                             |
| <b>Age achieved walking</b>                               | 3.5 years                                                                                                        | 22 months                                            | 16 months                                                         | 18 months                                                                                                 | 2.5 years                                                                   | 16 months                                                                                               |
| <b>Global developmental delay/intellectual disability</b> | severe; on formal testing verbal reasoning and adaptive skills <1% (ABAS-II, Leiter-R, PPVT-4)                   | language DQ 51%, visual motor DQ 51%                 | normal intellectual functioning; grade-level academic performance | IQ at age 21 years: FSIQ 46 (moderate ID)                                                                 | IQ at age 7 years: >55 (mild to moderate ID)                                | severe; reading, writing, and adaptive function at kindergarten level at age 14                         |
| <b>Communication/speech</b>                               | first words at 5 years, sentences at 7 years, mainly uses single words and short phrases at 16 years, dysarthria | first words at 2 years, 2–3-word phrases, dysarthria | normal speech                                                     | first word at 13 months, put 2 words together at 2.5 years, dysarthria                                    | language development initially normal, can use simple sentences, dysarthria | significant early delay, phrases at 3 years but limited vocabulary, now short phrases, dysarthria       |
| <b>Gross motor</b>                                        | ambulatory, spastic gait, ataxia, occasional dystonic posturing                                                  | ambulatory, in-toeing L > R                          | mild gross motor delay as an infant                               | ambulatory, ataxia, falls monthly, spasticity and increasing unsteadiness                                 | ambulatory, spastic gait                                                    | gross motor delay, ambulatory, spastic gait, mild ataxia                                                |
| <b>Fine motor</b>                                         | needs assistance to feed herself, dress, and bathe, can print her name                                           | feeds self with spoon and fork                       | normal                                                            | can use utensils but prefers finger feeding, does not color within lines, needs assistance with most ADLs | needs assistance with all activities of daily living                        | cuts own food but needs help with buttons and zippers, feeds self, needs assistance to bathe and toilet |
| <b>Appendicular hypertonia/spasticity</b>                 | severe, progressive                                                                                              | none                                                 | none                                                              | severe, progressive, LEs>>UEs                                                                             | clearly present, progressive                                                | moderate, all 4 limbs, LE > UE                                                                          |

(Continued on next page)

**Table 1. Continued**

| <b>Subject</b>                      | <b>1</b>                                                                                                                                                             | <b>2</b>                                                                      | <b>3</b>                                                                                                                                                                | <b>4</b>                                                                                                                                                                 | <b>5</b>                                                                                    | <b>6</b>                                                                                   |
|-------------------------------------|----------------------------------------------------------------------------------------------------------------------------------------------------------------------|-------------------------------------------------------------------------------|-------------------------------------------------------------------------------------------------------------------------------------------------------------------------|--------------------------------------------------------------------------------------------------------------------------------------------------------------------------|---------------------------------------------------------------------------------------------|--------------------------------------------------------------------------------------------|
| <b>Deep tendon reflexes</b>         | 4+ with sustained ankle clonus, +Hoffman sign                                                                                                                        | normal and symmetric                                                          | 1+ in biceps, triceps, absent in patella and ankles bilaterally                                                                                                         | 3+ throughout, except 1+ at the ankles                                                                                                                                   | arms, 3+; legs, 4+ (crossed adductor reflex, sustained ankle clonus)                        | 3+ bilaterally                                                                             |
| <b>Extensor plantar responses</b>   | yes                                                                                                                                                                  | no                                                                            | no                                                                                                                                                                      | yes                                                                                                                                                                      | yes                                                                                         | yes                                                                                        |
| <b>Muscle weakness</b>              | MRC grade 5/5 UEs, tibialis anterior and extensor hallucis longus 4/5                                                                                                | normal strength                                                               | prominent distal leg weakness                                                                                                                                           | not tested formally but grossly normal, no asymmetry                                                                                                                     | not tested formally, no obvious weakness                                                    | MRC grade 5/5 throughout                                                                   |
| <b>Sensory examination</b>          | not able to cooperate with formal exam                                                                                                                               | grossly normal                                                                | decreased vibration and proprioception in distal limbs                                                                                                                  | uncooperative for detailed exam, hypersensitivity in the feet bilaterally                                                                                                | detailed sensory exam not possible, light touch preserved                                   | unable to cooperate with formal exam                                                       |
| <b>Cerebellar testing</b>           | mirror movements, intention tremor, mild dysmetria, gait ataxia, unable to perform tandem gait                                                                       | normal for age                                                                | slightly wide-based gait                                                                                                                                                | slow finger to nose movements, clearly ataxic gait with bilateral circumduction, unable to perform tandem gait or stance                                                 | mild intention tremor and dysmetria, unable to balance on one foot or perform tandem gait   | no overt appendicular ataxia but mild gait ataxia and unable to perform tandem gait        |
| <b>Seizures</b>                     | no                                                                                                                                                                   | onset 3 years, head and bilateral arm drop attacks, also generalized seizures | no                                                                                                                                                                      | onset 6 months, refractory generalized epilepsy, myoclonic, rarely atonic and absence                                                                                    | onset 12 months, head drop attacks, refractory to medications and ketogenic diet            | no                                                                                         |
| <b>Brain MRI</b>                    | mild cerebellar atrophy, non-specific T2 and FLAIR hyperintensities                                                                                                  | normal                                                                        | normal (except for Chiari I malformation)                                                                                                                               | non-specific white matter signal abnormalities, stable over time                                                                                                         | normal (age 5 years)                                                                        | initially delayed myelination that normalized by 14 years                                  |
| <b>EMG/NCS (age when performed)</b> | length-dependent primary axonal neuropathy with secondary demyelination, markedly decreased velocities in motor fibers of tibial and deep peroneal nerves (13 years) | normal (4 years)                                                              | severe demyelinating sensory motor polyneuropathy, normal amplitudes, mild-moderate prolonged distal latencies, significant slowing of conduction velocities (10 years) | predominantly demyelinating sensory motor neuropathy, slow motor conduction velocities, markedly decreased amplitudes in tibial nerve, absent sural responses (12 years) | combined axonal and demyelinating polyneuropathy of both motor and sensory nerves (7 years) | predominantly demyelinating polyneuropathy with slow conduction velocities (6 and 8 years) |

Abbreviations are as follows: OFC, occipitofrontal circumference; DQ, development quotient; ID, intellectual disability; L, left; R, right; ADLs, activities of daily living; LE, lower extremity; UE, upper extremity; MRC, Medical Research Council

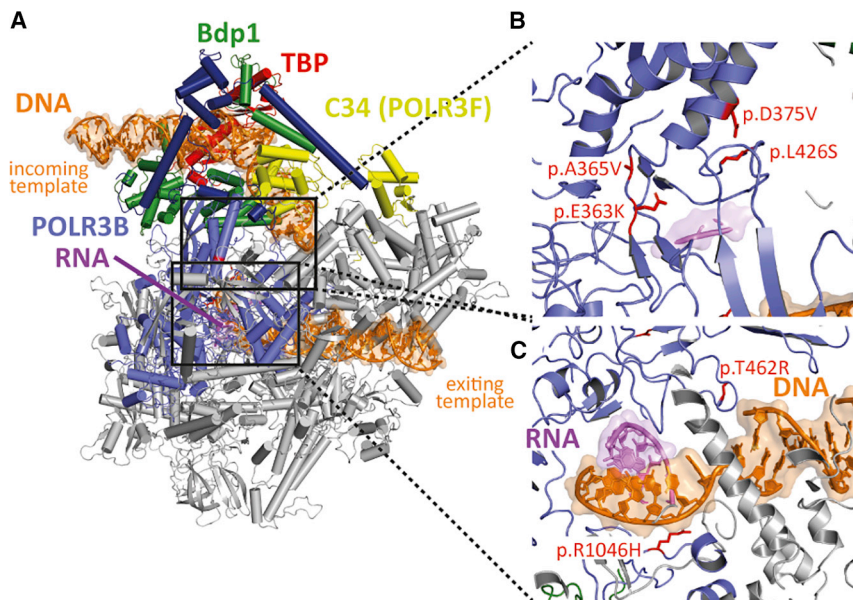

**Figure 1. Structural protein modeling**  
 (A) In order to localize the *POLR3B* variants found in the patients on the yeast *POLR3B* structure, we used the model of *POLR3* in transcription initiation state.<sup>13</sup>  
 (B) Of the six variants identified, four of them cluster in a region of *POLR3B* where transcribed DNA is melted.  
 (C) No direct contacts with other *POLR3* subunits were identified, but the mutated region is at the transcription bubble and may have an impact on transcription itself. Similarly, the two remaining variants are located in the exiting DNA tunnel and have direct contact with the duplex DNA. These variants may affect transcription activity. Of note, none of the identified variants are at the interface with transcription factors or transcription repressors (e.g., Maf1). *POLR3B*-altered residues found in the six patients and their equivalent yeast positions are as follows: Asp375 = Asp390, Leu426 = Leu444, Arg1046 = Arg1061, Ala365 = Ala380, Glu363 = Glu378, and Thr462 = Ser480.

children to participate in the study and for publication of clinical information.

We identified six unrelated individuals, from non-consanguineous families, who harbor *de novo* heterozygous variants in *POLR3B* (Figure S1) with consistent clinical features that differ from those associated with previously reported bi-allelic mutations<sup>1,2</sup> (Table 1).

The six participants each had some degree of gait dysfunction ranging from mild instability to more severe gait ataxia. Five participants (subjects 1, 3, 4, 5, and 6) had truncal and/or appendicular ataxia with wide-based ataxic gait, inability to perform tandem gait, or gait instability (Table 1, Supplemental notes). Three participants had hyperreflexia, while one had normal deep tendon reflexes, one had diminished reflexes, and one had a mixed picture of proximal hyperreflexia with distal hyporeflexia.

The majority of individuals also had some degree of delay in other developmental domains; intellectual disability ranging from mild to moderate severity was diagnosed in 5/6 participants. Only one individual (subject 3) had normal academic performance and development apart from early mild motor delay. This individual also had normal language, while the other 5/6 participants had dysarthria and/or varying degrees of delayed early speech development ranging from normal to markedly delayed (the most severely affected, subject 1, achieved first words at 5 years of age). Four individuals (subjects 1, 4, 5, and 6) required assistance with basic activities of daily living, suggestive of significant degrees of intellectual disability and/or coordination and movement difficulties, however no subject had developmental regression. Motor delay also varied from mild to severe; independent ambulation was achieved by all participants between 16 months and 3.5 years of age.

Other clinical features were less consistently present. Seizures appeared to be variably present: 3/6 participants

(subjects 2, 4, and 5) had seizures of diverse semiologies. Two are refractory to medical management with seizure onset at 6–12 months of age, while subject 2 responded well to anti-epileptic medications and had seizure onset later at 3 years of age. There did not appear to be an association between presence of seizures and other features, including brain MRI abnormalities, severity of clinical phenotype, or developmental history. Although there was no clear pattern of bulbar involvement, subject 4 had dysphagia and oromotor dyspraxia. Feeding was otherwise normal; only one other subject had early food aversion, which resolved.

Although various additional clinical features were noted (Table 1, Supplemental notes), there were no consistent abnormalities found with respect to growth, endocrinopathies, dentition, vision, or cardiovascular or skeletal systems. All participants were born at term, had normal birth weights, and were born to non-consanguineous parents of varied ethnic origins.

EMG/NCSs for the majority of individuals (5/6) revealed predominantly demyelinating sensory and motor neuropathy (Table 1, Table S2). Subject 4 had a muscle biopsy that showed neuropathic changes. Subject 2 had NCSs at a young age (4 years) that was reported as normal. Brain MRI did not reveal specific abnormalities; three participants (subjects 2, 3, and 5) had normal brain imaging, and two participants (subjects 1 and 4) had non-specific white matter signal abnormalities, one of whom (subject 1) also had mild cerebellar atrophy (Figure S2). Other routine clinical investigations (microarray and metabolic testing) were noncontributory (Supplemental notes).

Using genomic DNA from subjects 1, 2, 3, 4, and 6 and their respective parents, we captured the exonic regions and flanking splice junctions of the genome by using the IDT xGen Exome Research Panel v.1.0. Massively parallel next-generation sequencing (NGS) was performed on an

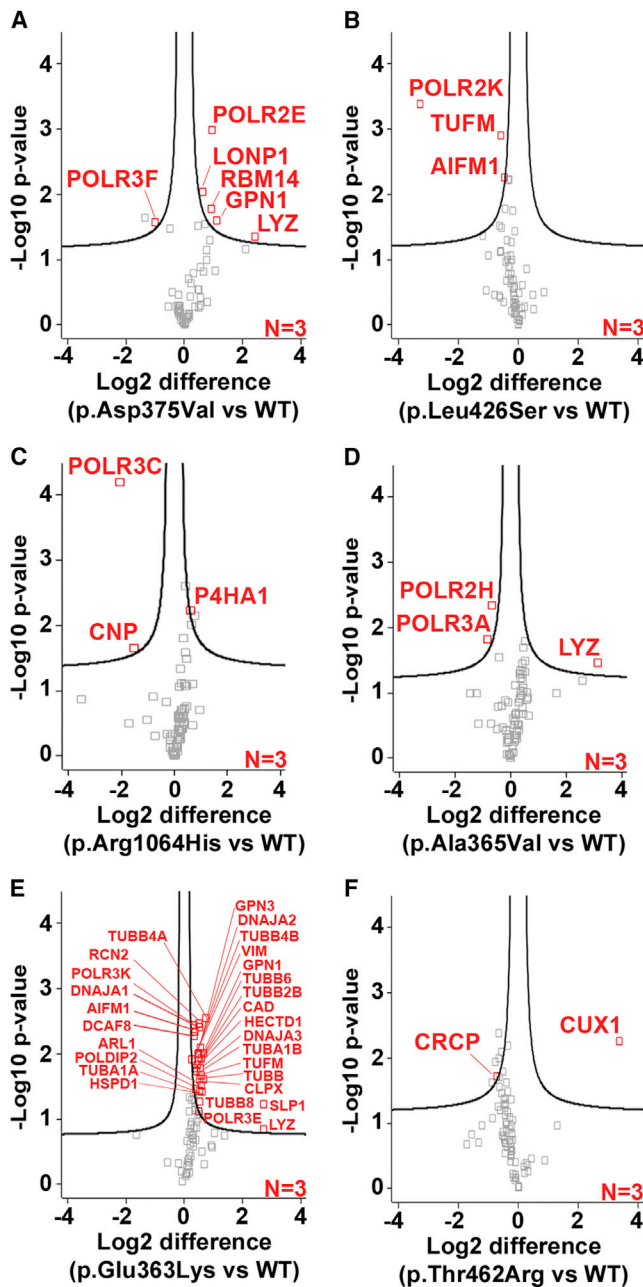

**Figure 2. Different *POLR3B* *de novo* variants distinctively affect the assembly of specific RNA polymerase III subunits** (A–F) FLAG-tagged *POLR3B* wild type (WT), p.Asp375Val (A), p.Leu426Ser (B), p.Arg1064His (C), p.Ala365Val (D), p.Glu363Lys (E), and p.Thr462Arg (F) were expressed in HEK293 cells for 24 h, purified with an anti-FLAG antibody, and digested with trypsin. The co-purified proteins were identified by liquid chromatography-tandem mass spectrometry (LC-MS/MS). The label-free quantification (LFQ) intensity of each peptide was computed via MaxQuant and Perseus. Volcano plots illustrate the  $\log_2$ -transformed average LFQ-intensity difference between mutant and WT (x axis), and the  $-\log_{10}$  p value obtained via a two-tailed t test adjusted with a permutation-based multiple hypothesis testing with 10,000 iterations and an  $s_0$  correction factor of 0.1 (y axis). Proteins marked in red are considered significantly different between the conditions.

Illumina system with 150 bp paired-end reads. Reads were aligned to human genome build GRCh37/UCSC hg19 and analyzed for sequence variants with a custom-developed analysis tool. Additional sequencing technology and variant interpretation protocols have been previously described.<sup>11</sup> The general assertion criteria for variant classification are publicly available on the GeneDx ClinVar submission page. For subject 5, trio whole-exome sequencing was performed via the SureSelect XT Human All Exon V5 kit (Agilent) at a mean target depth of 100 $\times$ . Reads were aligned to Hg19 via BWA (BWA-MEM v.0.7.5a) and variants were called with the GATK haplotype caller (v.2.7-2). Detected variants were annotated, filtered, and prioritized via the Bench lab NGS v.3.1.2 platform (Cartagenia, Leuven, Belgium) and confirmed by Sanger sequencing.

*POLR3B* variants identified in the participants were localized and correlated on the yeast *POLR3* structure. A sequence alignment of the *POLR3B* subunit was generated and the equivalent positions (Table S1) were then displayed on the yeast model of *POLR3* in the transcription initiation state (Figure 1A).<sup>12,13</sup> Four of the six *de novo* variants cluster in a region of *POLR3B* where transcribed DNA is melted (Figure 1B). No direct contacts with other *POLR3* subunits were identified, but the affected region is at the transcription bubble, which may have an impact on transcription itself. The two remaining variants are located in the exiting DNA tunnel and have direct contact with the duplex DNA (Figure 1C) and may thereby affect transcription activity.

To further define the impact of the *de novo* variants on *POLR3B*, we carried out affinity purification coupled with mass spectrometry (AP-MS) to evaluate the assembly of specific RNA pol III subunits in human embryonic kidney cell line 293 (HEK293) cells (Supplemental notes). AP-MS demonstrated that five of the six variants in *POLR3B* (GenBank: NM\_018082.5) caused impairment of the association of at least one individual subunit, either *POLR3F* (c.1124A>T [p.Asp375Val]), *POLR2K* (c.1277T>C [p.Leu426Ser]), *POLR3C* (c.3137G>A [p.Arg1064His]), *POLR3A* and *POLR2H* (c.1094C>T [p.Ala365Val]), and *CRCP* (c.1385C>G [p.Thr462Arg]), with the enzyme (Figure 2). Although this remains to be directly confirmed, the loss of a pol III subunit is expected to render the enzyme inactive, as has been shown for RNA polymerase II.<sup>14–16</sup> The c.1087G>A (p.Glu363Lys) variant was associated with abnormal *POLR3B* interactions with multiple proteins (Figure 2, Table S3), but their exact functional role in this context remains to be determined. Expression of *POLR3B* in fibroblasts from subject 1 was similar to that of control fibroblasts (data not shown), suggesting that the c.1124A>T (p.Asp375Val) variant does not have a direct effect on expression of the protein. Notably, all six *de novo* *POLR3B* variants localized in the nucleus as measured by immunoblots of cytoplasmic and nuclear fractions (Figure S3), suggesting that a defect in nucleocytoplasmic pol III shuttling is unlikely.



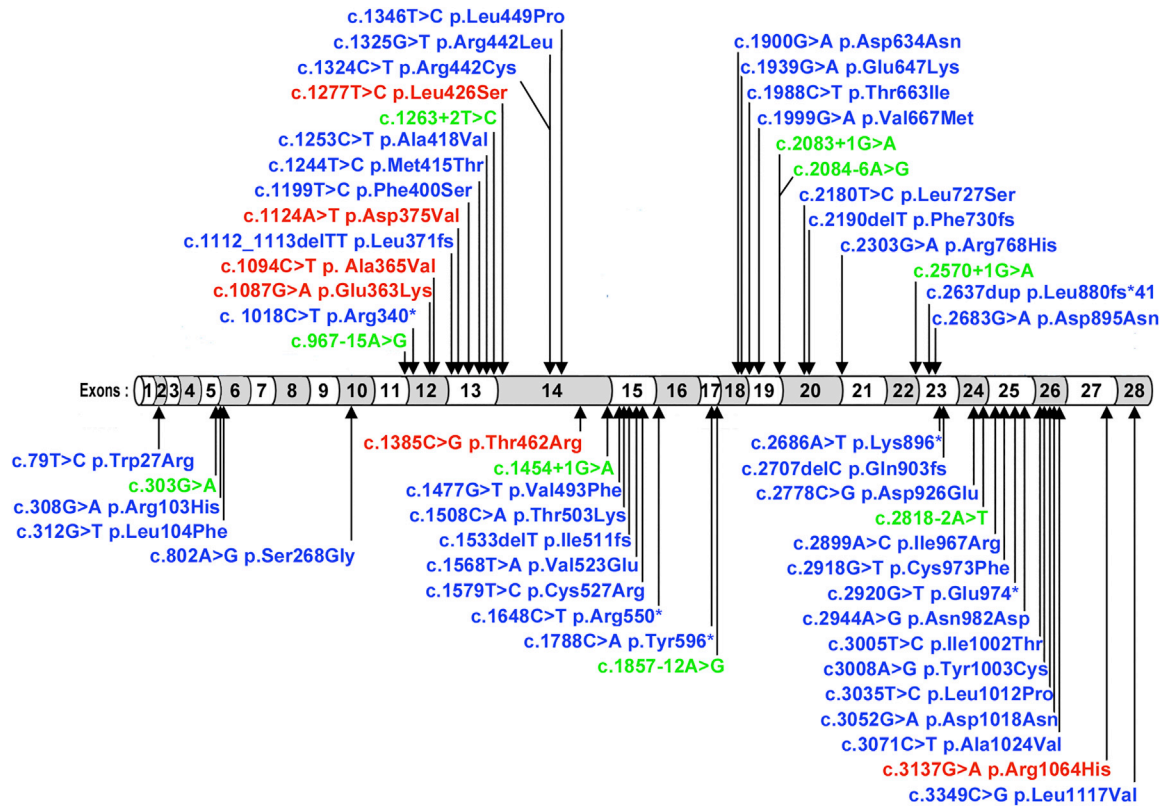

**Figure 3. *De novo* POLR3B variants differ from known recessive POLR3B pathogenic variants**

Recessive variants in *POLR3B* exons (blue) or introns (green) include missense, frameshift, premature truncation, and splicing variants.<sup>18,19</sup> *De novo* *POLR3B* pathogenic missense variants reported in this study are marked in red and do not overlap with the recessive variants.

Recessive mutations in *POLR3A*, *POLR3B*, *POLR1C*, and *POLR3K* are a well-established cause of hypomyelinating leukodystrophy.<sup>1,5-7,9</sup> The individuals with *de novo* heterozygous missense variants in *POLR3B* reported in this study manifest a different set of clinical features, further expanding the phenotypes of *POLR3B*-related disease to include this distinct disorder. Importantly, brain imaging did not reveal evidence of hypomyelination or leukodystrophy. Participants had pyramidal signs and gait dysfunction of varying severity, as well as some degree of intellectual disability ranging from mild to moderate severity. Most notably, EMG/NCSs for the majority of individuals (5/6) revealed predominantly demyelinating sensory and motor neuropathy. The remaining subject had NCSs at a young age and may not yet have developed this symptom. The shared clinical phenotype of these six individuals provides strong evidence for the pathogenicity of these variants.

In previous studies, we have shown that the recessive mutations in *POLR3B*, which generate variant proteins (p.Arg103His and p.Val523Glu) that do not associate with multiple subunits of the 17-subunit RNA pol III and which clearly show impaired ability to assemble into the active enzyme, cause hypomyelinating leukodystrophies.<sup>17</sup> In contrast, our studies of these *de novo* *POLR3B* variants suggest they cause disruption in the association of one or two enzyme subunits rather than impairment of full enzyme assembly or nuclear transport of the complex. These results

are suggestive of a distinct mechanism of pathogenicity for these six *de novo* heterozygous mutations, most likely a dominant-negative effect. Of note, recessive variants in *POLR3B* include missense, frameshift, premature truncation, and splicing variants, whereas the *de novo* *POLR3B* pathogenic variants we report in this study are missense and do not overlap with the recessive variants (Figure 3). Protein structural modeling suggests that these variants may exert their pathogenicity either via alterations in the local environment or by disruption of the assembly of a functionally active pol III pre-initiation complex,<sup>12</sup> however definitive proof will require further studies.

Our results contribute to understanding how mutations targeting several different amino acids of the same pol III subunit (i.e., *POLR3B*) can exhibit distinct pathological effects in human beings. Our study provides a description of the clinical phenotype and functional evidence for a *de novo* heterozygous *POLR3B*-related disorder characterized by spasticity, ataxia, and neuropathy. We expand the spectrum of disorders associated with pathogenic variants in *POLR3B*.

### Data and code availability

This study did not generate or analyze any new datasets or code.

## Supplemental Data

Supplemental Data can be found online at <https://doi.org/10.1016/j.ajhg.2020.12.002>.

## Acknowledgments

We thank the patients and their families for their participation in the study; this work would not have been possible without their generosity. This study was partly supported by a grant from the Canadian Institutes of Health Research to G.B. and B.C. (CIHR; 201610PJT-377869). G.B. has received the CIHR New Investigator Salary Award (2017–2022). B.C. holds a Bell-Bombardier Research Chair awarded by the IRCM. N.I.W. is a member of the European Reference Network for Rare Neurological Disorders (ERN-RND, project ID 739510).

## Declaration of interests

N.I.W. served as advisor for Orchard and PassageBio and participates in a clinical multicenter trial led by Shire/Takeda. G.B. has no relevant conflict of interest. She has received compensation for advisory boards from Ionis (2019), Shire (2013), Actelion Pharmaceuticals (2011), and Santhera Pharmaceutical (2011) and speaker honoraria from Genzyme (2013) and Actelion Pharmaceutical (2012). She received research grants from Shire/Takeda and Bluebird Bio. B.B. is an employee of GeneDx, Inc.

Received: July 9, 2020

Accepted: December 2, 2020

Published: December 28, 2020

## Web resources

Exome Variant Server, NHLBI GO Exome Sequencing Project (ESP), <https://evs.gs.washington.edu/EVS/>  
GeneDx ClinVar submission page, <https://www.ncbi.nlm.nih.gov/clinvar/submitters/26957/>  
gnomAD, <https://gnomad.broadinstitute.org/>  
OMIM, <https://omim.org/>

## References

1. Tétéreault, M., Choquet, K., Orcesi, S., Tonduti, D., Balottin, U., Teichmann, M., Fribourg, S., Schiffmann, R., Brais, B., Vanderver, A., and Bernard, G. (2011). Recessive mutations in POLR3B, encoding the second largest subunit of Pol III, cause a rare hypomyelinating leukodystrophy. *Am. J. Hum. Genet.* *89*, 652–655.
2. Wolf, N.I., Harting, I., Innes, A.M., Patzer, S., Zeitler, P., Schneider, A., Wolff, A., Baier, K., Zschocke, J., Ebinger, F., et al. (2007). Ataxia, delayed dentition and hypomyelination: a novel leukoencephalopathy. *Neuropediatrics* *38*, 64–70.
3. Wolf, N.I., Harting, I., Boltshauser, E., Wiegand, G., Koch, M.J., Schmitt-Mechelke, T., Martin, E., Zschocke, J., Uhlenberg, B., Hoffmann, G.F., et al. (2005). Leukoencephalopathy with ataxia, hypodontia, and hypomyelination. *Neurology* *64*, 1461–1464.
4. Timmons, M., Tsokos, M., Asab, M.A., Seminara, S.B., Zirzow, G.C., Kaneski, C.R., Heiss, J.D., van der Knaap, M.S., Vanier, M.T., Schiffmann, R., and Wong, K. (2006). Peripheral and central hypomyelination with hypogonadotropic hypogonadism and hypodontia. *Neurology* *67*, 2066–2069.
5. Bernard, G., Chouery, E., Putorti, M.L., Tétéreault, M., Takano-hashii, A., Carosso, G., Clément, I., Boespflug-Tanguy, O., Rodriguez, D., Delague, V., et al. (2011). Mutations of POLR3A encoding a catalytic subunit of RNA polymerase Pol III cause a recessive hypomyelinating leukodystrophy. *Am. J. Hum. Genet.* *89*, 415–423.
6. Thiffault, I., Wolf, N.I., Forget, D., Guerrero, K., Tran, L.T., Choquet, K., Lavallée-Adam, M., Poitras, C., Brais, B., Yoon, G., et al. (2015). Recessive mutations in POLR1C cause a leukodystrophy by impairing biogenesis of RNA polymerase III. *Nat. Commun.* *6*, 7623.
7. Dorboz, I., Dumay-Odelot, H., Boussaid, K., Bouyacoub, Y., Barreau, P., Samaan, S., Jmel, H., Eymard-Pierre, E., Cances, C., Bar, C., et al. (2018). Mutation in *POLR3K* causes hypomyelinating leukodystrophy and abnormal ribosomal RNA regulation. *Neurol. Genet.* *4*, e289.
8. Saitsu, H., Osaka, H., Sasaki, M., Takanoashi, J., Hamada, K., Yamashita, A., Shibayama, H., Shiina, M., Kondo, Y., Nishiyama, K., et al. (2011). Mutations in POLR3A and POLR3B encoding RNA Polymerase III subunits cause an autosomal-recessive hypomyelinating leukoencephalopathy. *Am. J. Hum. Genet.* *89*, 644–651.
9. Gauquelin, L., Cayami, F.K., Sztrihai, L., Yoon, G., Tran, L.T., Guerrero, K., Hocke, F., van Spaendonck, R.M.L., Fung, E.L., D'Arrigo, S., et al.; DDD Study (2019). Clinical spectrum of POLR3-related leukodystrophy caused by biallelic *POLR1C* pathogenic variants. *Neurol. Genet.* *5*, e369.
10. Cayami, F.K., Bugiani, M., Pouwels, P.J.W., Bernard, G., van der Knaap, M.S., and Wolf, N.I. (2018). 4H Leukodystrophy: Lessons from 3T Imaging. *Neuropediatrics* *49*, 112–117.
11. Retterer, K., Juusola, J., Cho, M.T., Vitazka, P., Millan, F., Gibellini, F., Vertino-Bell, A., Smaoui, N., Neidich, J., Monaghan, K.G., et al. (2016). Clinical application of whole-exome sequencing across clinical indications. *Genet. Med.* *18*, 696–704.
12. Abascal-Palacios, G., Ramsay, E.P., Beuron, F., Morris, E., and Vannini, A. (2018). Structural basis of RNA polymerase III transcription initiation. *Nature* *553*, 301–306.
13. Vorländer, M.K., Khatler, H., Wetzler, R., Hagen, W.J.H., and Müller, C.W. (2018). Molecular mechanism of promoter opening by RNA polymerase III. *Nature* *553*, 295–300.
14. Woychik, N.A., and Young, R.A. (1990). RNA polymerase II subunit RPB10 is essential for yeast cell viability. *J. Biol. Chem.* *265*, 17816–17819.
15. Archambault, J., Schappert, K.T., and Friesen, J.D. (1990). A suppressor of an RNA polymerase II mutation of *Saccharomyces cerevisiae* encodes a subunit common to RNA polymerases I, II, and III. *Mol. Cell. Biol.* *10*, 6123–6131.
16. Runner, V.M., Podolny, V., and Buratowski, S. (2008). The Rpb4 subunit of RNA polymerase II contributes to cotranscriptional recruitment of 3' processing factors. *Mol. Cell. Biol.* *28*, 1883–1891.
17. Choquet, K., Pinard, M., Yang, S., Moir, R.D., Poitras, C., Dicaire, M.J., Sgarioto, N., Larivière, R., Kleinman, C.L., Willis, I.M., et al. (2019). The leukodystrophy mutation Polr3b R103H causes homozygote mouse embryonic lethality and impairs RNA polymerase III biogenesis. *Mol. Brain* *12*, 59.

18. Wolf, N.I., Vanderver, A., van Spaendonk, R.M., Schiffmann, R., Brais, B., Bugiani, M., Siskind, E., Catsman-Berrevoets, C., Kros, J.M., Pinto, P.S., et al.; 4H Research Group (2014). Clinical spectrum of 4H leukodystrophy caused by *POLR3A* and *POLR3B* mutations. *Neurology* 83, 1898–1905.
19. Richards, M.R., Plummer, L., Chan, Y.M., Lippincott, M.F., Quinton, R., Kumanov, P., and Seminara, S.B. (2017). Phenotypic spectrum of *POLR3B* mutations: isolated hypogonadotropic hypogonadism without neurological or dental anomalies. *J. Med. Genet.* 54, 19–25.



**Supplemental Data**

***De novo* variants in *POLR3B* cause ataxia,  
spasticity, and demyelinating neuropathy**

**Djordja Djordjevic, Maxime Pinard, Marie-Soleil Gauthier, Constance Smith-Hicks, Trevor L. Hoffman, Nicole I. Wolf, Renske Oegema, Ellen van Binsbergen, Berivan Baskin, Geneviève Bernard, Sébastien Fribourg, Benoit Coulombe, and Grace Yoon**

## Supplemental Data

### Supplemental Case Histories

#### Subject 1

The proband is a 16 year old female born to non-consanguineous parents of East Indian descent at 36 weeks gestational age. Birth weight was 2130g and delivery was uncomplicated. She had global developmental delay and achieved walking at 3.5 years and first words at 5 years. Early infant feeding difficulties and axial hypotonia in infancy later resolved. Formal cognitive testing revealed intellectual delay with nonverbal cognitive abilities, verbal reasoning and adaptive skills less than first percentile for age. She remains dysarthric and mainly speaks in single word phrases. She can print her name but requires assistance to feed and dress. She is ambulatory but with an unsteady, spastic gait. She is unable to perform tandem gait. She has had progressive spasticity and intermittent dystonic posturing. Additional pyramidal signs include 4+ deep tendon reflexes, sustained ankle clonus, positive Hoffman's sign, and extensor plantar responses. She has full power throughout on MRC grading, apart from 4/5 power in her tibialis anterior muscle and extensor hallucis longus. Cerebellar testing revealed mirror movements on rapid alternating movement testing, an intention tremor and mild dysmetria. She has left esotropia but a normal retinal exam, and normal dentition apart from multiple caries. She has oligomenorrhea but normal LH, FSH and estrogen levels. Metabolic testing and microarray were unremarkable. Her brain MRI at age 10 years shows mild cerebellar atrophy and T2 FLAIR hyper intensities of the periventricular white matter, which are nonspecific. She has had normal VEPs, delayed upper brainstem conduction bilaterally on BAEPs and abnormal SSEPs with delayed cortical responses bilaterally. EMG/NCS at 13 and 15 years of age showed a length dependent axonal neuropathy with secondary demyelination (markedly decreased velocities in lower limb motor fibres).

## Subject 2

The proband is a 4-year-old boy of Turkish heritage and unremarkable pregnancy and perinatal histories. He was born at 37 weeks with a birth weight of 1928g. He initially demonstrated food refusal and restriction, but this resolved over time. He presented at 18 months old with developmental delay affecting speech and gross motor skills. Generalized epilepsy was diagnosed at 3 years of age, and seizures were characterized by drop attacks and tonic-clonic events that were initially well controlled on Levetiracetam but later required addition of Valproic acid with good control achieved. EEG at 3.5 years of age revealed normal background, with bilateral spike and slow wave complexes, poly spike and wave, associated with bilateral arm drop and/or head drops; with treatment by 4 years the EEG had normalized. He was also diagnosed with intellectual disability and attention deficit hyperactivity disorder. His history is negative for regression. On examination he speaks in 2-3 word phrases and speech is dysarthric. He is ambulatory but walks with an awkward in-toed gait.

## Subject 3

The proband was born at term following an uneventful pregnancy and delivery to non-consanguineous parents of mixed Northern European descent. He was born at 40 weeks with a birth weight of 3175g. The patient walked at around 16 months. Other early developmental milestones and growth parameters were reported to be within normal limits. The parents noted difficulties with running coordination and frequent trips/falls starting around age 7 years. The patient had some progression in these symptoms, so he was evaluated by a pediatric neurologist at age 9 years. Physical examination by pediatric neurologist revealed patient had normal muscle tone, bulk and strength but impaired sensation to pinprick, joint position, and vibration in all extremities along with foot drop and a wide-based and high-stepping gait. He had ataxia of limbs

with eyes closed, and he was diagnosed with a sensory ataxia and a peripheral neuropathy was suspected. Nerve conduction study performed at age 10 years revealed a severe demyelinating sensorimotor polyneuropathy. MRI of brain/spine revealed a Chiari type I malformation. He underwent a trial of IVIG at age 11 years that provided no apparent clinical benefit. The patient currently attends a regular school and is reported to perform grade-level academic work. He has difficulty with some fine motor skills such as writing neatly.

#### Subject 4

The proband is a 22 year-old male of mixed Irish and French heritage with non-contributory family history, pregnancy and perinatal histories. He was born at 40 weeks with a birth weight of 3940g. He presented at six months of age with myoclonic seizures. Over the years, he developed other generalized seizures: atonic and absence seizures. He never had generalized tonic-clonic seizures. His seizures are intractable with more than 20 anti-epileptic medications tried and two trials of ketogenic diet. He underwent a vagal nerve implantation at 5 years of age and an anterior callosotomy at age 10 years. At the age of 19 years, his seizures were noted to be better controlled. EEG at 2 years of age revealed frequent generalized bursts of spike and wave activity during sleep. Repeat study at 3 years revealed clinical myoclonic seizures with multifocal independent and generalized epileptiform discharges, and at 3.5 years showed generalized slowing, bursts of polyspike and wave discharges, with interval improvement. He was diagnosed with global developmental delay around 12 months of age. He is also known for moderate intellectual disability, ADHD with impulsivity. As an adolescent, he had significant behavior difficulties. He is also known to have sensorimotor polyneuropathy, chronic back pain attributed to degenerative disc disease and L5-S1 spondylolisthesis. He also had oromotor dyspraxia, and progressive dysphagia. His examination at 22 years was significant for mild dysarthria, mild

dystonia, spasticity, more so in the lower than the upper extremities, brisk reflexes, except at the ankle where they were reduced, and bilateral Babinski sign, hypersensitivity of the feet, gait ataxia and a positive Romberg sign. Current medications include Valproic acid, Oxcarbazepine, Gabapentin, Clonidine, Depo- Provera, Pantoprazole, and Ranitidine.

### Subject 5

This 8-year-old female proband was born to unrelated parents of Western European origin after an uneventful pregnancy. Delivery was term and uncomplicated, and birth weight was 3350g. She had plagiocephaly treated with helmet therapy and global developmental delays. She learnt to walk without support at age 2.5 years and her IQ was 55 at age 7 years. Her speech is slightly dysarthric, and she uses simple sentences. She was found to have partial growth hormone deficiency (age 2.5 y), which was not treated as her growth was stable. From age 12 months, she had epilepsy with mainly atonic seizures (loss of tone of neck muscles), from age 5 years she also developed atypical absences. Numerous EEGs from 12 months of age consistently revealed spikes and spike waves, which increased during night-time to up to 30% of the recording. Treatment with several antiepileptic drugs (valproic acid, levetiracetam, clobazam, topiramate), methylprednisolone and ketogenic diet did not consistently improve seizures until topiramate was reintroduced at age 8 years with good effect. Neurological examination at age 7 years was remarkable for saccadic pursuit, mild intention tremor and dysmetria, pyramidal signs (legs) and inability to stand on her heels. She had mild scoliosis. Brain MRI at age 6 years was normal. Nerve conduction velocities at age 7 years showed moderately severe motor and sensory polyneuropathy with both de/hypomyelinating and axonal characteristics.

### Subject 6



The proband is a 14 year old female born at term to non-consanguineous parents of Italian, Scottish and English descent. Birth weight was 2948g. Delivery was uncomplicated. She is microcephalic. She had global developmental delay and achieved walking at 15 months and speaking in phrases at 3 years. Early infant feeding difficulties later resolved. She is currently reading and writing at a senior kindergarten level. She remains difficult to understand and speaks in short phrases with limited vocabulary. She is ambulatory and now can run following an early gross motor delay, however is unable to perform tandem gait. She has spasticity which is more pronounced in the lower limbs. Additional pyramidal signs include 3+ deep tendon reflexes throughout and extensor plantar responses. She has full power throughout on MRC grading. Metabolic testing and microarray were unremarkable. Her brain MRI at age 14 years is normal. She has had abnormal SEPs, showing absent peripheral and cortical response of posterior tibial nerves. EMG/NCS at 6 and 8 years of age showed a predominantly demyelinating polyneuropathy with slowed conduction velocities, more in the lower limbs.

Subject 1: c.1124A>T p.Asp375Val

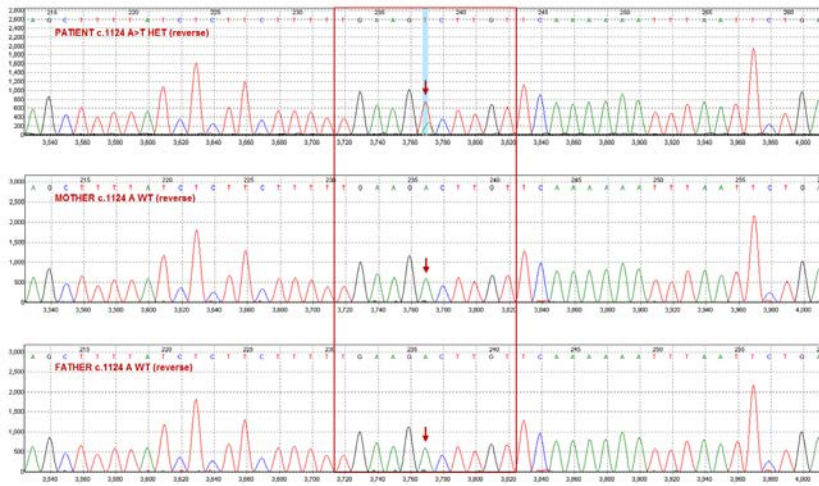

Subject 2: c.1277T>C p.Leu426Ser

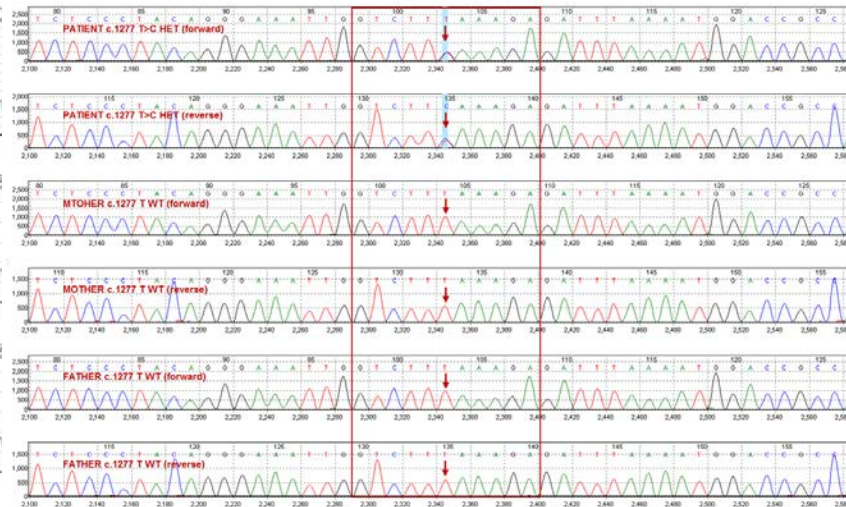

Subject 3: c.3137G>A p.Arg1046His

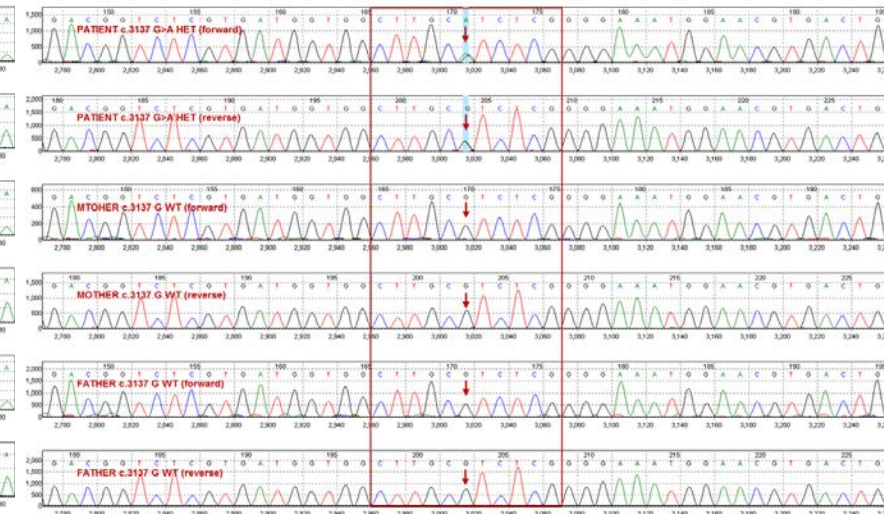

Subject 4: c.1094C>T p.Ala365Val

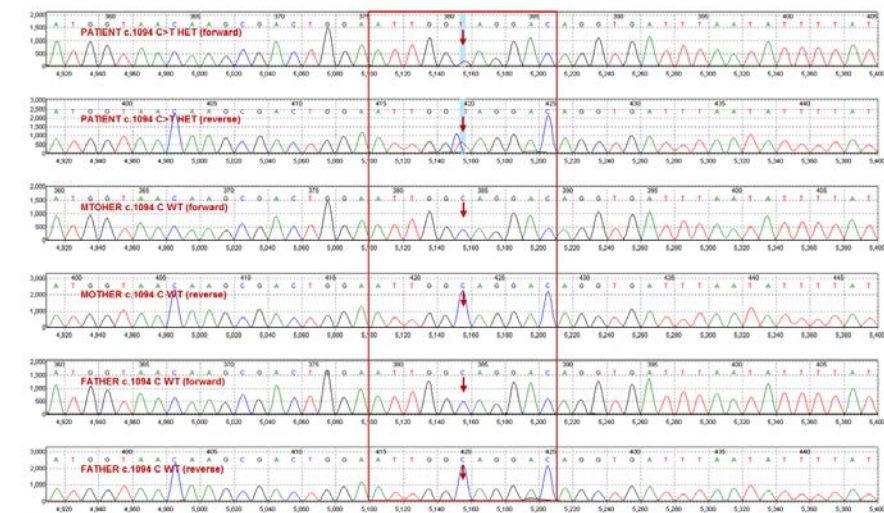

Subject 5: c.1087G>A p.Glu363Lys

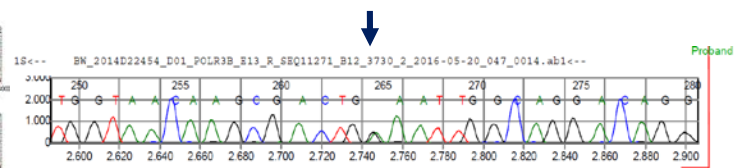

Subject 6: 1385C>G p.Thr462Arg

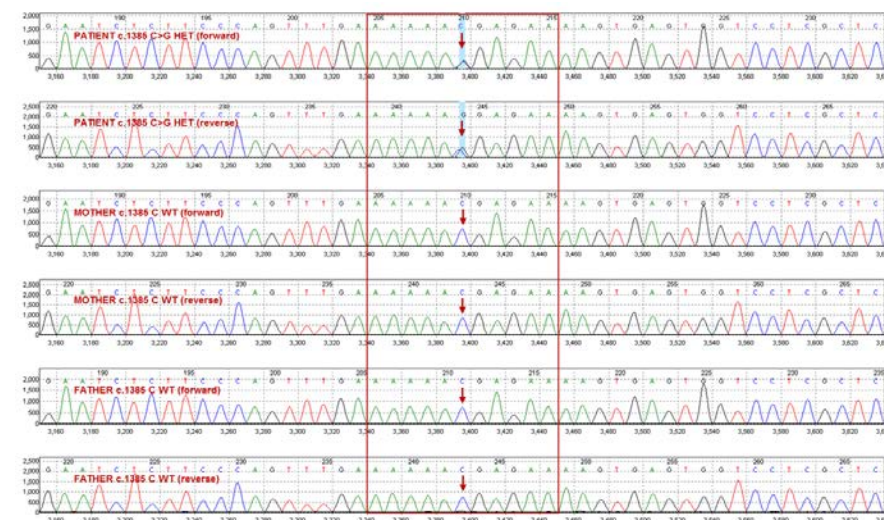

**Figure S1. Sanger electropherograms of all probands and parents.** Normal parental sequences for Subject 5 are not shown, but all other families clearly demonstrate *de novo* occurrence of the *POLR3B* variants.





**Figure S2. Brain imaging of all subjects 1-6 (A-F).** MRI images of sagittal T1 (A-F), axial T2 (at middle cerebellar peduncles, A<sup>1</sup>-F<sup>1</sup>) and axial T2 (at lateral ventricles, A<sup>2</sup>-F<sup>2</sup>). There is evidence of mild cerebellar atrophy (A) and T2 hyper intensities (A<sup>2</sup>) in the brain MRI of Subject 1, and Subject 4 (D<sup>2</sup>) but this is otherwise not present in the other subjects. All 6 subjects had normal brain myelination, with no evidence of hypomyelination or leukodystrophy.



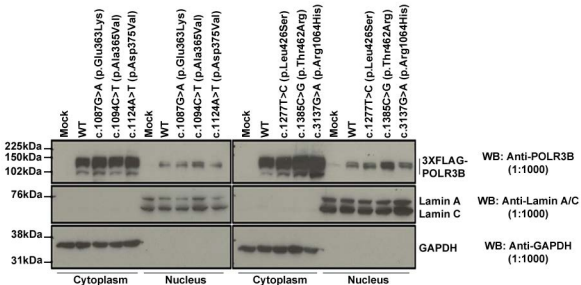

**Figure S3. *POLR3B* de novo mutations do not appear to affect protein localization.**

Subcellular fractions were obtained from HEK 293 cells transiently expressing either POLR3B

Wt or the various mutants as indicated. Results of a representative immunoblot are shown.

HEK293 cells treated with transfection reagent were used as a negative control (Mock).

POLR3B-3XFlag localization was assessed by western blot with an anti-FLAG primary antibody

(1:1000). GAPDH (1:1000) and Lamin A/C (1:1000) were used as loading controls and markers

of cytoplasmic or nucleus (nucleoplasm and chromatin) extracts respectively.

**Table S1. Equivalent *POLR3B* variants in humans and yeast.**

| <b>Subject</b> | <b><i>POLR3B</i> variant</b> | <b>Amino acid Change</b> | <b>Yeast Equivalent</b> |
|----------------|------------------------------|--------------------------|-------------------------|
| 1              | c.1121AA>T                   | p.Asp375Val              | Asp390                  |
| 2              | c.1277T>C                    | p.Leu426Ser              | Leu444                  |
| 3              | c.3137G>A                    | p.Arg1046His             | Arg1061                 |
| 4              | c.1094C>T                    | p.Ala365Val              | Ala380                  |
| 5              | c.1087C>G                    | p.Glu363Lys              | Glu378                  |
| 6              | c.1385C>G                    | p.Thr462Arg              | Ser480                  |

**Table S2. Detailed electrophysiological results of the nerve conduction studies.** Underlined values are interpreted as being abnormal. NA:Not Available, NR:Non-Recordable, L:Left, R: Right

| Subject    | Motor nerve conduction                        | Distal latency (ms)<br>(normal $\leq$ ms) <sup>1,2</sup>                                    | Amplitude (mV) (normal $\geq$ mV) <sup>1,2</sup>                   | Velocity (m/s)<br>(normal $\geq$ m/s) <sup>1,2</sup>                                   |
|------------|-----------------------------------------------|---------------------------------------------------------------------------------------------|--------------------------------------------------------------------|----------------------------------------------------------------------------------------|
| 1 - age 15 | L Median<br>L Peroneal<br>L Tibial            | 3.7 (4.0)<br>4.5 (6.5)<br>5.8 (5.0)                                                         | 13.4 (4.0)<br><u>0.6</u> (2.0)<br><u>0.2</u> (4.0)                 | <u>47.3</u> (50)<br><u>30.5</u> (45)<br><u>35.9</u> (40)                               |
| 2 - age 5  | R Tibial                                      | 3.1 (4.5)                                                                                   | 8.8 (4.0)                                                          | 40 (40)                                                                                |
| 3 - age 10 | L Ulnar<br>L Median<br>L Peroneal<br>L Tibial | <u>+ prolonged</u> (3.3)<br><u>++ prolonged</u> (4.0)<br><u>NR</u> (6.5)<br><u>NR</u> (5.0) | Normal (6.0)<br>Normal (4.0)<br><u>NR</u> (2.0)<br><u>NR</u> (4.0) | <u>+++ slowing</u> (50)<br><u>+++ slowing</u> (50)<br><u>NR</u> (45)<br><u>NR</u> (40) |
| 4 - age 12 | R Ulnar<br>R Median<br>R Peroneal<br>R Tibial | NA (3.3)<br>NA (4.0)<br>Normal (6.5)<br>NA (5.0)                                            | NA (6.0)<br>Normal (4.0)<br>Normal (2.0)<br><u>&lt;1.0</u> (4.0)   | 49.4 (50)<br>46.3 (50)<br><u>32.1</u> (45)<br><u>34.7</u> (40)                         |
| 5 - age 7  | R Median<br>L Peroneal                        | 3.54 (4.0)<br>6.3 (6.5)                                                                     | 4.3 (4.0)<br><u>1.5</u> (2.0)                                      | 44.2 (50)<br><u>28.4</u> (45)                                                          |
| 6 - age 8  | L Median<br>L Peroneal<br>L Tibial            | 4.1 (4.0)<br>6.2 (6.5)<br>6.5 (5.0)                                                         | 9.2 (4.0)<br><u>1.2</u> (2.0)<br><u>3.4</u> (4.0)                  | <u>41</u> (50)<br><u>36.3</u> (45)<br><u>33.7</u> (40)                                 |

| Subject    | Sensory nerve conduction       | Distal latency (ms)<br>(normal $\leq$ ms) <sup>1,2</sup> | Amplitude (mV) (normal $\geq$ mV) <sup>1,2</sup>    | Velocity (m/s)<br>(normal $\geq$ m/s) <sup>1,2</sup> |
|------------|--------------------------------|----------------------------------------------------------|-----------------------------------------------------|------------------------------------------------------|
| 1 - age 15 | L Median<br>L Peroneal         | 1.4 (3.1)<br><u>NR</u> (4.4)                             | 33 (20)<br><u>NR</u> (6)                            | 50.7 (50)<br><u>NR</u> (40)                          |
| 2 - age 5  | R Sural                        | 1.6 (4.4)                                                | 18.8 (6)                                            | 50 (40)                                              |
| 3 - age 10 | L Median<br>L Sural<br>L Ulnar | <u>NR</u> (3.1)<br><u>NR</u> (4.4)<br><u>NR</u> (3.1)    | <u>NR</u> (20)<br><u>NR</u> (6)<br><u>NR</u> (17)   | <u>NR</u> (50)<br><u>NR</u> (40)<br><u>NR</u> (50)   |
| 4 - age 12 | R Median<br>R Sural<br>R Ulnar | NA (3.1)<br><u>NR</u> (4.4)<br>NA (3.1)                  | <u>8.2</u> (20)<br><u>NR</u> (6)<br><u>4.6</u> (17) | NA (50)<br><u>NR</u> (40)<br>NA (50)                 |
| 5 - age 7  | R Median<br>L Peroneal         | 2.34 (3.1)<br>3.89 (4.4)                                 | <u>9.7</u> (20)<br>6.4 (6)                          | <u>38.4</u> (50)<br>NA (40)                          |
| 6 - age 8  | L Median                       | 2.1 (3.1)                                                | <u>3.1</u> (20)                                     | <u>31</u> (50)                                       |

**Table S3. List of significantly different protein interactions between p.Glu363Lys variant and WT POLR3B.** Q-values were obtained by adjusting p-values for multiple hypothesis testing using a permutation-based test by considering a False Discovery Rate (FDR) of 5% adjusted using an s0 correction factor of 0.1 with 10 000 iterations in Perseus (Version 1.6.10.43).

| Gene names    | Log2 Difference<br>(p.Glu363Lys-WT) | -Log10 p-value<br>(p.Glu363Lys-WT) | q-value<br>(p.Glu363Lys-WT) |
|---------------|-------------------------------------|------------------------------------|-----------------------------|
| AIFM1         | 0.373                               | 2.342                              | 0.009                       |
| ARL1          | 0.565                               | 1.514                              | 0.019                       |
| CAD           | 0.431                               | 1.836                              | 0.014                       |
| CLPX          | 0.658                               | 1.607                              | 0.010                       |
| DCAF8         | 0.322                               | 2.274                              | 0.018                       |
| DNAJA1        | 0.516                               | 2.416                              | 0.000                       |
| DNAJA2        | 0.501                               | 2.015                              | 0.000                       |
| DNAJA3        | 0.561                               | 1.775                              | 0.011                       |
| GPN1          | 0.666                               | 2.008                              | 0.000                       |
| GPN3          | 0.558                               | 2.102                              | 0.000                       |
| HECTD1        | 0.370                               | 1.774                              | 0.019                       |
| HSPD1         | 0.515                               | 1.435                              | 0.020                       |
| LYZ           | 2.715                               | 0.842                              | 0.030                       |
| POLDIP2       | 0.379                               | 1.468                              | 0.027                       |
| POLR3E        | 0.506                               | 1.125                              | 0.044                       |
| POLR3K        | 0.331                               | 2.438                              | 0.015                       |
| RCN2          | 0.492                               | 2.470                              | 0.000                       |
| SLPI          | 2.727                               | 1.227                              | 0.014                       |
| TUBA1A;TUBA3E | 0.592                               | 1.417                              | 0.016                       |
| TUBA1B;TUBA4A | 0.424                               | 1.736                              | 0.017                       |
| TUBB          | 0.516                               | 1.613                              | 0.013                       |
| TUBB2B        | 0.491                               | 1.883                              | 0.009                       |
| TUBB4A        | 0.750                               | 2.548                              | 0.000                       |
| TUBB4B        | 0.480                               | 2.003                              | 0.012                       |
| TUBB6         | 0.578                               | 1.928                              | 0.000                       |
| TUBB8         | 0.519                               | 1.272                              | 0.019                       |
| TUFM          | 0.564                               | 1.671                              | 0.016                       |
| VIM           | 0.267                               | 1.918                              | 0.037                       |



## Supplemental Methods

### Affinity purification coupled with mass spectrometry (AP-MS)

Human embryonic kidney cell line 293 (HEK293) cells were cultured in DMEM medium supplemented with 10% fetal bovine serum and 2mM glutamine and transfected with FLAG-tagged WT or mutant POLR3B (p.Asp375Val, p.Leu426Ser, p.Arg1064His, p.Ala365Val, p.Glu363Lys, or p.Thr462Arg) expressing plasmids by using Jet Prime transfection reagent (PolyPlus). Transfected cells were incubated at 37°C for 24h, washed with sterile PBS, pelleted at 3500RPM and snap frozen. Affinity purifications were performed in three independent replicate experiments for each mutant and WT. The speedvac protein extracts were re-solubilized in 10µL of a 6M urea buffer, reduced (45mM DTT, 100mM ammonium bicarbonate) for 30min at 37°C, and alkylated (100mM iodoacetamide, 100mM ammonium bicarbonate) for 20min at 24°C. Proteins were digested in 10µL of trypsin solution (5ng/µL of trypsin, Promega, 50mM ammonium bicarbonate) at 37°C for 18 h. The digests were acidified with trifluoroacetic acid and cleaned by MCX (Waters Oasis MCX 96-well Elution Plate). Peptides were identified by LC-MS/MS using HPLC coupled to an Orbitrap Fusion mass spectrometer (Thermo Scientific) through a Nanospray Flex Ion Source. MS/MS raw data were searched against the human SwissProt database (updated on April 24<sup>th</sup> 2019), and a reverse decoy, using MaxQuant (version 1.6.10.43)<sup>3</sup>. Label-free quantification (LFQ)-intensities were further analyzed with Perseus (Version 1.6.10.43)<sup>4</sup>. A log<sub>2</sub> transformation was applied to LFQ intensities. LFQ intensities reported as 0 by MaxQuant were replaced by randomly generated intensities normally distributed with a width of 0.3 times and a downshift of 1.8 times the standard deviation of non-zero intensities. For simplification, proteins that did not show enrichment compared to the empty vector control (p-value <0.05 and intensity difference higher or equal to 2) were excluded.

Statistical differences between protein intensities from WT and mutant experiments were determined using a two-tailed T-test adjusted for multiple hypothesis testing using a permutation-based test with a False discovery rate (FDR) of 5% adjusted using a  $s_0$  correction factor of 0.1 with 10 000 iterations<sup>5</sup>. The level of differential interaction with POLR3B was considered statistically significant when the adjusted P value was  $<0.05$ .

### **Fibroblast culture**

MCH 073 fibroblasts were isolated from a healthy control female subject. MCH073 and WM253.0 (c.1124A>T p.Asp375Val mutant) fibroblasts were maintained in culture in DMEM media supplemented with 10% fetal bovine serum and 2 mM glutamine.

### **Whole cell extract and Subcellular fractionation**

Fibroblast whole cell extracts were obtained followed by incubation with total lysing buffer (25mM HEPES pH8.0, 50 mM KCl, 1 mM EDTA, 0,05% NP40, 5% glycerol, 0.5 mM DTT, protease inhibitor cocktail (Roche), 1 mM PMSF, 10 mM NaF and 1 mM  $\text{Na}_3\text{VO}_4$ ) for 30 min at 4°C. 10 units of benzonase was added and each sample was sonicated three times for 10 s at an amplification with a Sonic Dismembrator model 100 (Fisher Scientific) and centrifuged at 16000xg for 30 min at 4°C. Protein concentrations were determined by Bradford assay. HEK293 cells were grown in 6 wells plates and transfected with Jet Prime reagent (PolyPLUS) with either p3XFLAG-CMV14-POLR3B WT, E363K, A365V, D375V, L426S, T462R and R1064H or with the transfection reagent alone (Mock) according to the manufacturer's recommendations for 24 h. The cytoplasmic fractions were obtained by incubation with hypotonic lysis buffer (10 mM

HEPES, 10% Glycerol, 1.5 mM MgCl<sub>2</sub>, 10 mM KCl, 0.5 mM DTT, 340 mM Sucrose, protease inhibitor cocktail (Roche), 1 mM PMSF, 10 mM NaF and 1 mM Na<sub>3</sub>VO<sub>4</sub>) for 10 min on ice.

0.1% of triton X100 was added, mixed for 10 seconds and centrifuged at 1200xg at 4°C to pellet the nuclei. The nucleus pellets were washed with hypotonic lysis buffer. Nuclear fractions were obtained by incubation with nuclear lysis buffer (10 mM HEPE, 420 mM NaCl, 0.2 mM EDTA, 0.2 mM EGTA, 1 mM DTT, 1 mM PMSF, 10 mM NaF, 1 mM Na<sub>3</sub>VO<sub>4</sub> and protease inhibitor cocktail) complemented with 10 units of benzonase (EMD millipore) for 30 min at 4°C with agitation. Each sample was sonicated three times for 10 s at an amplification setting of 30% with a Sonic Dismembrator model 100 (Fisher Scientific) and centrifuged at 16000xg for 30 min at 4°

C. Protein concentrations were determined by Bradford assay.

### **Western blot**

40 µg of whole cell extract from MCH073 and WM253.0 was loaded on a 10% polyacrylamide gel, transferred on a PVDF membrane (EMD millipore) and the membrane was blocked with PBS + 0.5% Tween20 + 5% milk. The membrane was washed six times with PBS + 0.5% Tween20 after antibody incubation and western blotting was performed with rabbit anti-POLR3B (EPR8719, AbCam) and mouse anti-GAPDH (0411, Santa Cruz). For subcellular fractions, 23.5 µg of cytoplasmic extract and 15 µg of nuclear extract (each value corresponding roughly to 1/20 of each fraction) were loaded on an 10% polyacrylamide gel, transferred on a PVDF membrane (EMD millipore) and the membrane blocked with PBS + 0.5 % Tween20 + 5% milk. The membrane was washed three times with PBS + 0.5% Tween20 after antibody

incubation and western blotting was performed with mouse anti-FLAG (M2, Sigma), mouse anti-GAPDH (0411, Santa Cruz), and rabbit anti-Lamin A/C (EPR4068, AbCam) antibodies.

### **Subcellular fractionation**

HEK293 cells were grown in 6 wells plates and transfected with Jet Prime reagent (PolyPLUS) with either p3XFLAG-CMV14-POLR3B WT, E363K, A365V, D375V, L426S, T462R and R1064H or with the transfection reagent alone (Mock) according to manufacturer's recommendations for 24 h. The cytoplasmic fractions were obtained by incubation with hypotonic lysis buffer (10 mM HEPES, 10% Glycerol, 1.5 mM MgCl<sub>2</sub>, 10 mM KCl, 0.5 mM DTT, 340 mM Sucrose, protease inhibitor cocktail (Roche), 1 mM PMSF, 10 mM NaF and 1 mM NaVO<sub>4</sub>) for 10 min on ice. 0.1% of triton X100 was added, delicately mixed for 10 seconds and centrifuged at 1200xg at 4°C to pellet the nuclei. The nucleus pellets were washed with hypotonic lysis buffer. Nuclear fractions were obtained by incubation with nuclear lysis buffer (10 mM HEPE, 420 mM NaCl, 0.2 mM EDTA, 0.2 mM EGTA, 1 mM DTT, 1 mM PMSF, 10 mM NaF, 1 mM Na<sub>3</sub>VO<sub>4</sub> and protease inhibitor cocktail) complemented with 10 units of benzonase (EMD millipore) for 30 min at 4°C with agitation. Each sample was sonicated three times for 10 s at an amplification setting of 30% with a Sonic Dismembrator model 100 (Fisher Scientific) and centrifuged at 16000xg for 30 min at 4°C. Protein concentrations were determined by Bradford assay and 23.5 µg of cytoplasmic extract and 15 µg of nuclear extract (each value corresponding roughly to 1/20 of each fraction) were loaded on an 10% polyacrylamide gel. Western blotting was performed with mouse anti-FLAG (M2, Sigma), mouse anti-GAPDH (0411, Santa Cruz), and rabbit anti-Lamin A/C (EPR4068, AbCam) antibodies.

## Supplemental References

- [1] Garcia A, Calleja J, Antolin FM, Berciano J. (2000) Peripheral motor and sensory nerve conduction studies in normal infants and children. *Clinical neurophysiology : official journal of the International Federation of Clinical Neurophysiology*. 111:513-20.
- [2] Kang P. Pediatric Nerve Conduction Studies and EMG. In: Blum A, Rutkove, S ed. *The Clinical Neurophysiology Primer*: Humana Press, 2007: 369-389.
- [3] Cox, J. and Mann, M. (2008). MaxQuant enables high peptide identification rates, individualized p.p.b.-range mass accuracies and proteome-wide protein quantification. *Nat. Biotechnol.* 12, 1367-72
- [4] Tyanova, S., Temu, T., Sinitcyn, P., Carlson, A., Hein, M.Y., Geiger, T., Mann, M., Cox, J. (2016). The Perseus computational platform for comprehensive analysis of (prote)omics data. *Nat. Methods.* 13, 731–40.
- [5] Tusher, V.G., Tibshirani, R., Chu, G. (2001). Significance analysis of microarrays applied to the ionizing radiation response. *Proc. Natl. Acad. Sci. USA.* 98, 5116–21.
